# Supplementary material for: Economic burden and loss of quality of life from dry eye disease in Canada
Source: PubMed Central journal article supplement — BMJ Open Ophthalmol. 2021 Sep 15;6(1):e000709. doi: 10.1136/bmjophth-2021-000709 (PMC8444260; doi:10.1136/bmjophth-2021-000709), 2021-09-15
Supplement: bmjophth-2021-000709supp001.pdf [file bmjophth-2021-000709supp001.pdf]

---

## SECTION A: GENERAL QUESTIONS

### A1. Today's date

|     |  |       |  |      |  |  |  |
|-----|--|-------|--|------|--|--|--|
|     |  |       |  |      |  |  |  |
| Day |  | Month |  | Year |  |  |  |

### A2. What is your birth month and birth year?

|       |  |      |  |  |  |
|-------|--|------|--|--|--|
|       |  |      |  |  |  |
| Month |  | Year |  |  |  |

### A3. What is your sex?

- Male  
 Female

### A4. What is your ethnicity? You can put an in more than one box, if applicable.

- Caucasian  
 Latino/Hispanic  
 Middle Eastern  
 African  
 Caribbean  
 South Asian  
 East Asian  
 Other \_\_\_\_\_

### A5. What is the highest level of education you have achieved?

Look for your highest degree in education and fill in an x in the box.

- No certificate, diploma or degree  
 High school diploma or equivalency certificate  
 Trades: Certificate or diploma (excluding certificate of apprenticeship)  
 Trades: Certificate of Apprenticeship or Certificate of Qualification  
 College, CEGEP or other non-university certificate or diploma  
 University: Certificate or diploma BELOW bachelor level  
 University: Certificate, diploma or degree AT bachelor level  
 University: Certificate, diploma or degree ABOVE bachelor level

**A6. What is your employment status?** Place an  in the box for what you usually do.

- I am employed
- I am unemployed – looking for a job
- I am unemployed – not looking for a job
- I am on disability leave from work due to Dry Eye Disease (DED)
- I am on disability leave from work due to other reasons
- I am retired or on a pre-pension plan
- I do something else, namely: \_\_\_\_\_

---

## SECTION B: HEALTH QUESTIONS

### B1. Do you smoke?

- Previous smoker, but stopped
- Yes – current smoker
- No – never smoked

### B2. Are you currently pregnant?

- Yes
- No

### B3. Do you wear contact lenses?

- Yes
- No

### B4. How many hours per day do you estimate you spend looking at a screen?

(TV, phone, iPad/tablet, computer, etc.)

- 0 hours
- Less than 1 hour, more than 0
- 1-2 hours
- 3-4 hours
- 5-6 hours
- Other: \_\_\_\_ hours

### B5. Which type of treatment are you currently applying to your eyes?

Select all that apply.

- Preserved
- Non-preserved (ex. Lacrisert)
- Prescription eye drops (ex. Xiidra, Restasis)
- Specialty drugs
- Compounded ointments
- Gel (ex. Lotemax)
- Other \_\_\_\_\_
- I don't know
- None

**B6. What other medications are you currently taking? Select all that apply.**

- |                                                                                                           |                                                         |
|-----------------------------------------------------------------------------------------------------------|---------------------------------------------------------|
| <input type="checkbox"/> Anti-depressants                                                                 | <input type="checkbox"/> Beta blockers                  |
| <input type="checkbox"/> Anti-Cholinergics (e.g. Parkinson's medications, antipsychotics, sleeping pills) | <input type="checkbox"/> Oral contraceptives            |
| <input type="checkbox"/> Antihistamines                                                                   | <input type="checkbox"/> Diuretics                      |
| <input type="checkbox"/> Anti-anxiety                                                                     | <input type="checkbox"/> Chemotherapy/radiation therapy |
| <input type="checkbox"/> Botox                                                                            | <input type="checkbox"/> Other _____                    |
| <input type="checkbox"/> Hormone replacement therapy                                                      | <input type="checkbox"/> I don't know                   |
| <input type="checkbox"/> Isotretinoin (e.g. Accutane)                                                     | <input type="checkbox"/> None                           |
| <input type="checkbox"/> Multivitamins                                                                    |                                                         |

**B7. Have you been formally diagnosed with Sjögren syndrome?**

- Yes  
 No  
 I don't know

**B8. Do you currently have any of the following conditions? Select all that apply.**

- |                                                                                            |                                                                                             |
|--------------------------------------------------------------------------------------------|---------------------------------------------------------------------------------------------|
| <input type="checkbox"/> Androgen deficiency                                               | <input type="checkbox"/> Mental health conditions ( <i>i.e. mood, depression, anxiety</i> ) |
| <input type="checkbox"/> Autoimmune diseases ( <i>e.g. Sjögren, RA, lupus</i> )            | <input type="checkbox"/> Migraines                                                          |
| <input type="checkbox"/> Chronic pain                                                      | <input type="checkbox"/> Rosacea                                                            |
| <input type="checkbox"/> Diabetes                                                          | <input type="checkbox"/> Sick Building Syndrome                                             |
| <input type="checkbox"/> Fibromyalgia                                                      | <input type="checkbox"/> Thyroid disorder                                                   |
| <input type="checkbox"/> Gout                                                              | <input type="checkbox"/> Vitamin A deficiency                                               |
| <input type="checkbox"/> Hematopoietic stem cell transplantation or Graft vs. Host Disease | <input type="checkbox"/> Other _____                                                        |
| <input type="checkbox"/> HIV                                                               | <input type="checkbox"/> None                                                               |
| <input type="checkbox"/> Irritable Bowel Syndrome                                          |                                                                                             |

**B9. How long have you been suffering from Dry Eye Disease?**

- For less than 1 year  
 For the past 1-5 years  
 For the past 6-10 years  
 Other \_\_\_\_\_ years

**B10. Other than Dry Eye Disease, do you have any of the following conditions?**

Select all that apply.

- Glaucoma
- Keratoconus +/- corneal collagen crosslinking
- Meibomian gland dysfunction
- Prior conjunctivitis (*pink eye*)
- Seasonal allergies with itchy eyes
- Surfer's Eye (*pterygium*)
- Other \_\_\_\_\_
- None

**B11. Have you had any ocular surgeries or injections?**

- Glaucoma surgery
- Cataract
- Eye lid surgery
- Refractive eye surgery, including LASIK or PRK
- Other \_\_\_\_\_
- None

---

## SECTION C: EYE DRYNESS SCORE

### Visual Analogue Scale (VAS)

Please rate your discomfort with the *Eye Dryness* symptom on a scale from 0 to 100 by placing a vertical mark ( | ) on the horizontal line indicating your level of eye discomfort

**0 corresponds to: "no discomfort"**

**100 corresponds to: "maximal (the most) discomfort"**

**Eye Dryness**

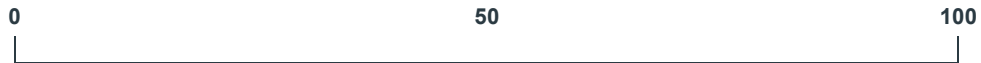

---

## SECTION D: VISUAL FUNCTIONING QUESTIONNAIRE – 25

The following is a survey with statements about problems which involve your vision or feelings that you have about your vision condition. After each question please choose the response that best describes your situation.

**Please answer all the questions as if you were wearing your glasses or contact lenses (if any).**

Please take as much time as you need to answer each question. All your answers are confidential. In order for this survey to improve our knowledge about vision problems and how they affect your quality of life, your answers must be as accurate as possible. Remember, if you wear glasses or contact lenses, please answer all of the following questions as though you were wearing them.

### PART 1 – GENERAL HEALTH AND VISION

1. In general, would you say your overall health is:

(Circle One)

Excellent .....

Very Good .....

Good .....

Fair .....

Poor .....

2. At the present time, would you say your eyesight using both eyes (with glasses or contact lenses, if you wear them) is excellent, good, fair, poor, or very poor or are you completely blind?

(Circle One)

Excellent .....

Good .....

Fair .....

Poor .....

Very Poor .....

Completely Blind .....

**3. How much of the time do you worry about your eyesight?**

*(Circle One)*

- None of the time ..... 1  
 A little of the time ..... 2  
 Some of the time ..... 3  
 Most of the time ..... 4  
 All of the time? ..... 5

**4. How much pain or discomfort have you had in and around your eyes (for example, burning, itching, or aching)? Would you say it is:**

*(Circle One)*

- None ..... 1  
 Mild ..... 2  
 Moderate ..... 3  
 Severe, or ..... 4  
 Very severe? ..... 5

**PART 2 – DIFFICULTY WITH ACTIVITIES**

The next questions are about how much difficulty, if any, you have doing certain activities wearing your glasses or contact lenses if you use them for that activity.

**5. How much difficulty do you have reading ordinary print in newspapers? Would you say you have:**

*(Circle One)*

- No difficulty at all ..... 1  
 A little difficulty ..... 2  
 Moderate difficulty ..... 3  
 Extreme difficulty ..... 4  
 Stopped doing this because of your eyesight..... 5  
 Stopped doing this for other reasons or not interested in doing this ..... 6



6. How much difficulty do you have doing work or hobbies that require you to see well up close, such as cooking, sewing, fixing things around the house, or using hand tools?

Would you say:

(Circle One)

- No difficulty at all ..... 1  
 A little difficulty ..... 2  
 Moderate difficulty ..... 3  
 Extreme difficulty ..... 4  
 Stopped doing this because of your eyesight..... 5  
 Stopped doing this for other reasons or not interested in doing this ..... 6

7. Because of your eyesight, how much difficulty do you have finding something on a crowded shelf?

(Circle One)

- No difficulty at all ..... 1  
 A little difficulty ..... 2  
 Moderate difficulty ..... 3  
 Extreme difficulty ..... 4  
 Stopped doing this because of your eyesight..... 5  
 Stopped doing this for other reasons or not interested in doing this ..... 6

8. How much difficulty do you have reading street signs or the names of stores?

(Circle One)

- No difficulty at all ..... 1  
 A little difficulty ..... 2  
 Moderate difficulty ..... 3  
 Extreme difficulty ..... 4  
 Stopped doing this because of your eyesight..... 5  
 Stopped doing this for other reasons or not interested in doing this ..... 6

9. Because of your eyesight, how much difficulty do you have going down steps, stairs, or curbs in dim light or at night?

(Circle One)

- No difficulty at all ..... 1  
 A little difficulty ..... 2  
 Moderate difficulty ..... 3  
 Extreme difficulty ..... 4  
 Stopped doing this because of your eyesight..... 5  
 Stopped doing this for other reasons or not interested in doing this ..... 6

10. Because of your eyesight, how much difficulty do you have noticing objects off to the side while you are walking along?

(Circle One)

- No difficulty at all ..... 1  
 A little difficulty ..... 2  
 Moderate difficulty ..... 3  
 Extreme difficulty ..... 4  
 Stopped doing this because of your eyesight..... 5  
 Stopped doing this for other reasons or not interested in doing this ..... 6

11. Because of your eyesight, how much difficulty do you have seeing how people react to things you say?

(Circle One)

- No difficulty at all ..... 1  
 A little difficulty ..... 2  
 Moderate difficulty ..... 3  
 Extreme difficulty ..... 4  
 Stopped doing this because of your eyesight..... 5  
 Stopped doing this for other reasons or not interested in doing this ..... 6

**12. Because of your eyesight, how much difficulty do you have picking out and matching your own clothes?**

(Circle One)

- No difficulty at all ..... 1  
 A little difficulty ..... 2  
 Moderate difficulty ..... 3  
 Extreme difficulty ..... 4  
 Stopped doing this because of your eyesight..... 5  
 Stopped doing this for other reasons or not interested in doing this ..... 6

**13. Because of your eyesight, how much difficulty do you have visiting with people in their homes, at parties, or in restaurants?**

(Circle One)

- No difficulty at all ..... 1  
 A little difficulty ..... 2  
 Moderate difficulty ..... 3  
 Extreme difficulty ..... 4  
 Stopped doing this because of your eyesight..... 5  
 Stopped doing this for other reasons or not interested in doing this ..... 6

**14. Because of your eyesight, how much difficulty do you have going out to see movies, plays, or sports events?**

(Circle One)

- No difficulty at all ..... 1  
 A little difficulty ..... 2  
 Moderate difficulty ..... 3  
 Extreme difficulty ..... 4  
 Stopped doing this because of your eyesight..... 5  
 Stopped doing this for other reasons or not interested in doing this ..... 6

**15. Are you currently driving, at least once in a while?***(Circle One)*

- Yes ..... 1      *Skip To Q 15c*  
 No ..... 2

**15a. IF NO: Have you never driven a car or have you given up driving?***(Circle One)*

- Never drove ..... 1      *Skip To Part 3, Q 17*  
 Gave up..... 2

**15b. IF YOU GAVE UP DRIVING: Was that mainly because of your eyesight, mainly for some other reason, or because of both your eyesight and other reasons?***(Circle One)*

- Mainly eyesight ..... 1      *Skip To Part 3, Q 17*  
 Mainly other reasons ..... 2      *Skip To Part 3, Q 17*  
 Both eyesight and other reasons ..... 3      *Skip To Part 3, Q 17*

**15c. IF CURRENTLY DRIVING: How much difficulty do you have driving during the daytime in familiar places? Would you say you have:***(Circle One)*

- No difficulty at all ..... 1  
 A little difficulty ..... 2  
 Moderate difficulty ..... 3  
 Extreme difficulty ..... 4

**16. How much difficulty do you have driving at night? Would you say you have:**

*(Circle One)*

- No difficulty at all ..... 1
- A little difficulty ..... 2
- Moderate difficulty ..... 3
- Extreme difficulty ..... 4
- Have you stopped doing this because of your eyesight ..... 5
- Have you stopped doing this for other reasons or are you not interested in doing this ..... 6

**16A. How much difficulty do you have driving in difficult conditions, such as in bad weather, during rush hour, on the freeway, or in city traffic? Would you say you have:**

*(Circle One)*

- No difficulty at all ..... 1
- A little difficulty ..... 2
- Moderate difficulty ..... 3
- Extreme difficulty ..... 4
- Have you stopped doing this because of your eyesight ..... 5
- Have you stopped doing this for other reasons or are you not interested in doing this ..... 6

**PART 3: RESPONSES TO VISION PROBLEMS**

The next questions are about how things you do may be affected by your vision. For each one, please circle the number to indicate whether for you the statement is true for you all, most, some, a little, or none of the time.

*(Circle One On Each Line)*

| READ CATEGORIES:                                                                                                                                                              | All of<br>the time | Most of<br>the time | Some of<br>the time | A little<br>of the<br>time | None of<br>the time |
|-------------------------------------------------------------------------------------------------------------------------------------------------------------------------------|--------------------|---------------------|---------------------|----------------------------|---------------------|
| 17. <u>Do you accomplish less than you would like because of your vision?</u>                                                                                                 | 1                  | 2                   | 3                   | 4                          | 5                   |
| 18. <u>Are you limited in how long you can work or do other activities because of your vision?</u>                                                                            | 1                  | 2                   | 3                   | 4                          | 5                   |
| 19. <u>How much does pain or discomfort in or around your eyes, for example, burning, itching, or aching, keep you from doing what you'd like to be doing? Would you say:</u> | 1                  | 2                   | 3                   | 4                          | 5                   |

For each of the following statements, please circle the number to indicate whether for you the statement is definitely true, mostly true, mostly false, or definitely false for you or you are not sure.

|                                                                                                     | (Circle One On Each Line) |                |             |                 |                     |
|-----------------------------------------------------------------------------------------------------|---------------------------|----------------|-------------|-----------------|---------------------|
|                                                                                                     | Definitely<br>True        | Mostly<br>True | Not<br>Sure | Mostly<br>False | Definitely<br>False |
| 20. I <u>stay home most of the time</u> because of my eyesight                                      | 1                         | 2              | 3           | 4               | 5                   |
| 21. I feel <u>frustrated</u> a lot of the time because of my eyesight                               | 1                         | 2              | 3           | 4               | 5                   |
| 22. I have <u>much less control</u> over what I do, because of my eyesight                          | 1                         | 2              | 3           | 4               | 5                   |
| 23. Because of my eyesight, I have to <u>rely too much on what other people tell me</u>             | 1                         | 2              | 3           | 4               | 5                   |
| 24. I <u>need a lot of help</u> from others because of my eyesight                                  | 1                         | 2              | 3           | 4               | 5                   |
| 25. I worry about doing things that <u>will embarrass myself or others</u> , because of my eyesight | 1                         | 2              | 3           | 4               | 5                   |

---

## SECTION E: WORK PRODUCTIVITY AND ACTIVITY IMPAIRMENT QUESTIONNAIRE

The following questions ask about the effect of your **Dry Eye Disease (DED)** on your ability to work and perform regular activities. *Please fill in the blanks or circle a number, as indicated.*

1. Are you currently employed (working for pay)? \_\_\_\_\_ NO \_\_\_ YES  
If NO, check "NO" and skip to question 6.

The next questions are about the **past seven days**, not including today.

2. During the past seven days, how many hours did you miss from work because of problems associated with your DED? Include hours you missed on sick days, times you went in late, left early, etc., because of your DED. Do not include time you missed to participate in this study.

\_\_\_\_\_ HOURS

3. During the past seven days, how many hours did you miss from work because of any other reason, such as vacation, holidays, time off to participate in this study?

\_\_\_\_\_ HOURS

4. During the past seven days, how many hours did you actually work?

\_\_\_\_\_ HOURS (If "0", skip to question 6.)

5. During the past seven days, how much did your DED affect your productivity while you were working?

Think about days you were limited in the amount or kind of work you could do, days you accomplished less than you would like, or days you could not do your work as carefully as usual. If DED affected your work only a little, choose a low number. Choose a high number if DED affected your work a great deal.

Consider only how much DED affected  
productivity while you were working.

DED had no effect  
on my work

0 1 2 3 4 5 6 7 8 9 10

DED completely  
prevented me from  
working

CIRCLE A NUMBER

**6. During the past seven days, how much did your DED affect your ability to do your regular daily activities, other than work at a job?**

By regular activities, we mean the usual activities you do, such as work around the house, shopping, childcare, exercising, studying, etc. Think about times you were limited in the amount or kind of activities you could do and times you accomplished less than you would like. If DED affected your activities only a little, choose a low number. Choose a high number if DED affected your activities a great deal.

Consider only how much DED affected your ability to do your regular daily activities, other than work at a job.

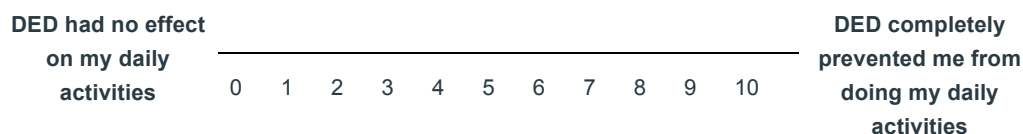

CIRCLE A NUMBER



---

## SECTION F: OUT-OF-POCKET EXPENSES

We want to better understand the financial burden that your Dry Eye Disease is having on you. The following questions ask about the amount of money you spend out of your own pocket when buying treatments such as eye drops or supplements, and any extra money you spend to see your ophthalmologist/optometrist.

### RESOURCE A: Over-the-Counter Ocular Lubricants - Artificial tears

(Examples: Systane, Refresh, Blink, Bion, Hydrasense, Hylo)

**1. Have you used NON-PRESCRIPTION ARTIFICIAL TEARS in the past 3 (THREE) months?**

- Yes
- No – skip to *RESOURCE B, Question #5*

**2. If so, how often do you usually use NON-PRESCRIPTION ARTIFICIAL TEARS daily?**

- 1-2 times a day
- 3-4 times a day
- 5-6 times a day
- Other: \_\_\_\_ times a day
- I don't know

**3. Are you paying for NON-PRESCRIPTION ARTIFICIAL TEARS out-of-pocket?**

- Yes, because I either don't have insurance or my insurance does not cover this
- Partially, since insurance covers some costs
- No, insurance pays for everything – skip to *RESOURCE B, Question #5*
- I don't know

**4. If so, how much money PER ONE MONTH are you typically spending on NON-PRESCRIPTION ARTIFICIAL TEARS?**

- \$10-19 per month
- \$20-29 per month
- \$30-39 per month
- \$40-49 per month
- Other: \$ \_\_\_\_ per month
- I don't know

**RESOURCE B: Over-the-Counter Ocular Lubricants - Gels or ointments***(Example: Teargel, Duolube, Lacrilube, Ocunox)***5. Have you used NON-PRESCRIPTION OCULAR GELS/OINTMENTS in the past 3 (THREE) months?**

- Yes
- No – skip to RESOURCE C, Question #9

**6. If so, how often do you usually use NON-PRESCRIPTION OCULAR GELS/OINTMENTS daily?**

- 1-2 times a day
- 3-4 times a day
- 5-6 times a day
- Other: \_\_\_\_ times a day
- I don't know

**7. Are you paying for NON-PRESCRIPTION OCULAR GELS/OINTMENTS out-of-pocket?**

- Yes, because I either don't have insurance or my insurance does not cover this
- Partially, since insurance covers some costs
- No, insurance pays for everything – skip to RESOURCE C, Question #9
- I don't know

**8. If so, how much money PER ONE MONTH are you typically spending on NON-PRESCRIPTION OCULAR GELS/OINTMENTS?**

- \$10-19 per month
- \$20-29 per month
- \$30-39 per month
- \$40-49 per month
- \$50-59 per month
- Other: \$\_\_\_\_ per month
- I don't know

**RESOURCE C: Prescription Ocular Lubricants**

(Example: serum tears, amniotic fluid extract (Regenereyes), albumin drops (specifically from princess Margaret hospital).

**9. Have you used PRESCRIPTION OCULAR LUBRICANT in the past 3 (THREE) months?**

- Yes
- No – skip to RESOURCE D, Question #13

**10. If so, how often do you usually use PRESCRIPTION OCULAR LUBRICANT daily?**

- 1-2 times a day
- 3-4 times a day
- 5-6 times a day
- Other: \_\_\_\_ times a day
- I don't know

**11. Are you paying for PRESCRIPTION OCULAR LUBRICANT out-of-pocket?**

- Yes, because I either don't have insurance or my insurance does not cover this
- Partially, since insurance covers some costs
- No, insurance pays for everything – skip to RESOURCE D, Question #13
- I don't know

**12. If so, how much money PER ONE MONTH are you typically spending on PRESCRIPTION OCULAR LUBRICANT?**

- \$40-49
- \$59-149
- \$150-169
- Other: \$\_\_\_\_ per month
- I don't know

**RESOURCE D: Prescription Ocular Anti-inflammatory Agents***(Example: Xiidra, Restasis, Cyclosporine, steroids, lotemax)***13. Have you used PRESCRIPTION OCULAR ANTI-INFLAMMATORY AGENTS in the past 3 (THREE) months?**

- Yes
- No – skip to RESOURCE E, Question #17

**14. If so, how often do you usually use PRESCRIPTION OCULAR ANTI-INFLAMMATORY AGENTS daily?**

- 1-2 times a day
- 3-4 times a day
- 5-6 times a day
- Other: \_\_\_\_ times a day
- I don't know

**15. Are you paying for PRESCRIPTION OCULAR ANTI-INFLAMMATORY AGENTS out-of-pocket?**

- Yes, because I either don't have insurance or my insurance does not cover this
- Partially, since insurance covers some costs
- No, insurance pays for everything – skip to RESOURCE E, Question #17
- I don't know

**16. If so, how much money PER ONE MONTH are you typically spending on PRESCRIPTION OCULAR ANTI-INFLAMMATORY AGENTS?**

- \$0-\$49 per month
- \$50-\$99 per month
- \$100-\$149 per month
- \$150-\$199 per month
- \$200-\$249 per month
- Other: \$ \_\_\_\_ per month
- I don't know

**RESOURCE E: Nutritional Supplements***(Example: fish oil, flax seed oil)*

**17. Have you used this resource NUTRITIONAL SUPPLEMENTS TO IMPROVE DRY EYE in the past 3 (THREE) months?**

- Yes
- No – skip to *RESOURCE F, Question #21*

**18. If so, how often do you usually use NUTRITIONAL SUPPLEMENTS TO IMPROVE DRY EYE?**

- Everyday
- Every other day
- Twice a week
- Once a week
- Once a month
- Other: \_\_\_ times per \_\_\_\_\_
- I don't know

**19. Are you paying for NUTRITIONAL SUPPLEMENTS TO IMPROVE DRY EYE out-of-pocket?**

- Yes, because I either don't have insurance or my insurance does not cover this
- Partially, since insurance covers some costs
- No, insurance pays for everything – skip to *RESOURCE F, Question #21*
- I don't know

**20. If so, how much money PER ONE MONTH are you typically spending on NUTRITIONAL SUPPLEMENTS TO IMPROVE DRY EYE?**

- \$0-\$9 per month
- \$10-\$19 per month
- \$20-\$29 per month
- \$30-\$39 per month
- \$40-\$49 per month
- Other: \$\_\_\_ per month
- I don't know

**RESOURCE F: Punctal Plugs****21. Have you had PUNCTAL PLUGS inserted in one or both of your eyes before?**

- Yes
- No – skip to *RESOURCE G, Question #25*

**22. If so, how many PUNCTAL PLUG implants have you had inserted?**

*(For example, if you have received 1 implant in each eye, the total number of implants you've receive is 2. If one of those implants fell out and you had to get it replaced, then the total number of implants you've ever had equals 3)*

- Only 1 implant in my life
- 2 implants in total in my life
- 3 implants in total in my life
- 4 implants in total in my life
- Other: \_\_\_ implants
- I don't know

**23. Did you pay for your PUNCTAL PLUG IMPLANTS out-of-pocket?**

- Yes, because I either don't have insurance or my insurance does not cover this
- Partially, since insurance covers some costs
- No, insurance pays for everything – skip to *RESOURCE G, Question #25*
- I don't know

**24. If so, how much money, on average, did you spend on PUNCTAL PLUG IMPLANTS?**

- \$0-\$49 per implant
- \$50-\$99 per implant
- \$100-\$149 per implant
- \$150-\$199 per implant
- \$200-\$249 per implant
- Other \$\_\_\_\_\_ per implant
- I don't know

**RESOURCE G: Optometrist Visits****25. Is TODAY your FIRST OPTOMETRIST VISIT for dry eye disease?**

- Yes – skip to *RESOURCE H Question #29*
- No

**26. If NOT, how many times did you VISIT THE OPTOMETRIST in the last 2 (TWO) YEARS for dry eye disease?**

- Twice a year
- Once a year
- Once every two years
- Other: \_\_\_ times per \_\_\_
- I don't know

**27. Do you pay anything out-of-pocket during these visits to the OPTOMETRIST?**

- Yes, because I either don't have insurance or my insurance does not cover this
- Partially, since insurance covers some costs
- No, insurance pays for everything – skip to *RESOURCE H, Question #29*
- I don't know

**28. If so, how much money on average PER VISIT?**

- \$0-\$49 per visit
- \$50-\$99 per visit
- \$100-\$149 per visit
- \$150-\$199 per visit
- \$200-\$249 per visit
- Other \$ \_\_\_ per visit
- I don't know

**RESOURCE H: Ophthalmologist Visits**

**29. Is TODAY your FIRST OPHTHALMOLOGIST visit for dry eye disease?**

- Yes – *skip to the end of the survey*
- No

**30. If NOT, how often did you VISIT THE OPHTHALMOLOGIST in the last 2 (TWO) YEARS for dry eye disease?**

- Twice a year
- Once a year
- Once every two years
- Other: \_\_\_ times per \_\_\_
- I don't know

**31. Do you pay anything out-of-pocket to VISIT THE OPHTHALMOLOGIST?**

- Yes, because I either don't have insurance or my insurance does not cover this
- Partially, since insurance covers some costs
- No, insurance pays for everything – *skip to the end of the survey*
- I don't know

**32. If so, how much money on average PER VISIT?**

- \$0
- \$1-\$49 per visit
- \$50-\$99 per visit
- \$100-\$149 per visit
- \$150-\$199 per visit
- \$200-\$249 per visit
- Other \$\_\_\_ per visit
- I don't know

**That was the last question.**

**What should you do with the survey now that it is filled in?**

Please return the completed survey and return it to your optometrist/ophthalmologist. Please note that all your answers will be treated as strictly confidential.

**Thank you very much!**
