# Supplementary material for: Economic burden and loss of quality of life from dry eye disease in Canada
Source: PubMed Central journal article supplement — BMJ Open Ophthalmol. 2021 Sep 15;6(1):e000709. doi: 10.1136/bmjophth-2021-000709 (PMC8444260; doi:10.1136/bmjophth-2021-000709), 2021-09-15
Supplement: bmjophth-2021-000709supp002.pdf [file bmjophth-2021-000709supp002.pdf]

**Table S2. Indirect cost outcomes from the Work Productivity and Activity Impairment survey<sup>12</sup>**

| <b>Absenteeism</b>                                                     |            |                                         |                                                                                                                  |
|------------------------------------------------------------------------|------------|-----------------------------------------|------------------------------------------------------------------------------------------------------------------|
| Percent work time missed due to problem, %                             | Continuous | E2, E4                                  | $E2/(E2+E4)$                                                                                                     |
| Average annual cost of missed work time, \$/year (SD)                  | Continuous | E2, E4, Statistics Canada <sup>13</sup> | Variable 1 multiplied by the patient's annual salary, inferred from education level, age, and sex <sup>13</sup>  |
| <b>Presenteeism</b>                                                    |            |                                         |                                                                                                                  |
| Percent impairment while working due to problem                        | Continuous | E5                                      | $E5/10$                                                                                                          |
| Average annual cost due to decrease in work productivity (\$/year, SD) | Continuous | E5, Statistics Canada <sup>13</sup>     | Variable #3 multiplied by the patient's annual salary, inferred from education level, age, and sex <sup>13</sup> |
| Percent activity impairment due to problem                             | Continuous | E6                                      | $E6/10$                                                                                                          |
| Percent overall work impairment due to problem                         | Continuous | E2, E4, E5                              | $E2/(E2+E4) + [(1 - (E2/(E2+E4))) \times (E5/10)]$                                                               |

SD, standard deviation
